# Supplementary material for: Immunotherapies for Anti-N-M-methyl-D-aspartate Receptor Encephalitis: Multicenter Retrospective Pediatric Cohort Study in China
Source: PubMed Central journal article supplement (PMC8276978; doi:10.3389/fped.2021.691599), 2021-06-29
Supplement: Data_Sheet_1.pdf [file Data_Sheet_1.pdf]

**Supplementary Table 1.** Relationships between mRS at symptom onset or after first-line immunotherapy and patient outcome within each treatment group.

|                                              | Complete<br>recovery (mRS =<br>0) | Incomplete<br>recovery (mRS<br>≥ 1) | $\chi^2$ | <i>p</i> value   |
|----------------------------------------------|-----------------------------------|-------------------------------------|----------|------------------|
| Second-line<br>immunotherapy group           |                                   |                                     | 1.394    | <i>p</i> = 0.238 |
| mRS at symptom<br>onset                      |                                   |                                     |          |                  |
| mRS ≤ 3                                      | 10                                | 4                                   |          |                  |
| mRS ≥ 4                                      | 23                                | 20                                  |          |                  |
| mRS after first-line<br>immunotherapy        |                                   |                                     | 4.059    | <i>p</i> = 0.044 |
| mRS ≤ 3                                      | 17                                | 6                                   |          |                  |
| mRS ≥ 4                                      | 16                                | 18                                  |          |                  |
| Repetitive first-line<br>immunotherapy group |                                   |                                     |          |                  |
| mRS at symptom<br>onset                      |                                   |                                     | 0.215    | <i>p</i> = 0.643 |
| mRS ≤ 3                                      | 8                                 | 6                                   |          |                  |
| mRS ≥ 4                                      | 21                                | 21                                  |          |                  |
| mRS after first-line<br>immunotherapy        |                                   |                                     | 1.125    | <i>p</i> = 0.289 |
| mRS ≤ 3                                      | 17                                | 12                                  |          |                  |
| mRS ≥ 4                                      | 12                                | 15                                  |          |                  |
| Oral prednisolone group                      |                                   |                                     | 0.561    | <i>p</i> = 0.756 |
| mRS at symptom<br>onset                      |                                   |                                     |          |                  |
| mRS ≤ 2                                      | 43                                | 9                                   |          |                  |
| mRS = 3                                      | 74                                | 18                                  |          |                  |
| mRS ≥ 4                                      | 73                                | 21                                  |          |                  |
| mRS after first-line<br>immunotherapy        |                                   |                                     | 13.006   | <i>p</i> = 0.001 |
| mRS ≤ 2                                      | 115                               | 24                                  |          |                  |
| mRS = 3                                      | 52                                | 8                                   |          |                  |
| mRS ≥ 4                                      | 23                                | 16                                  |          |                  |

Follow-up days w/ deceased patients

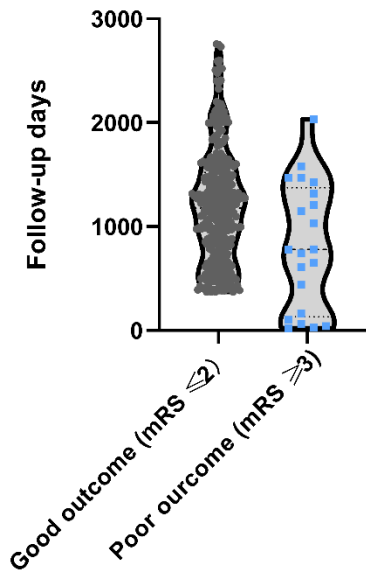

Follow-up days w/o deceased patients

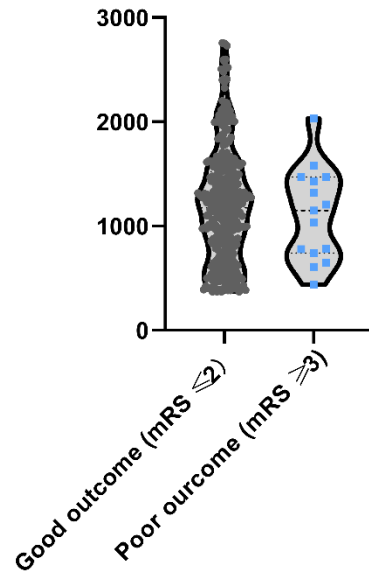

**Supplementary Figure 1.** Violin plot of distribution of follow-up duration of patients.
